# Supplementary material for: Optimizing network propagation for multi-omics data integration
Source: PubMed Central journal article supplement (PMC8664198; doi:10.1371/journal.pcbi.1009161), 2021-11-11

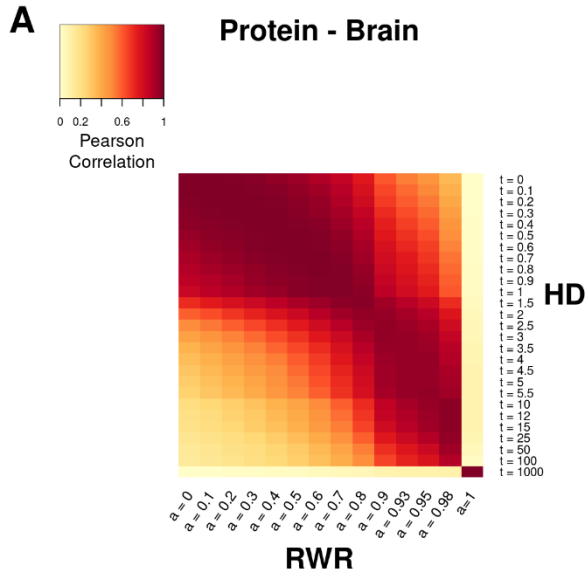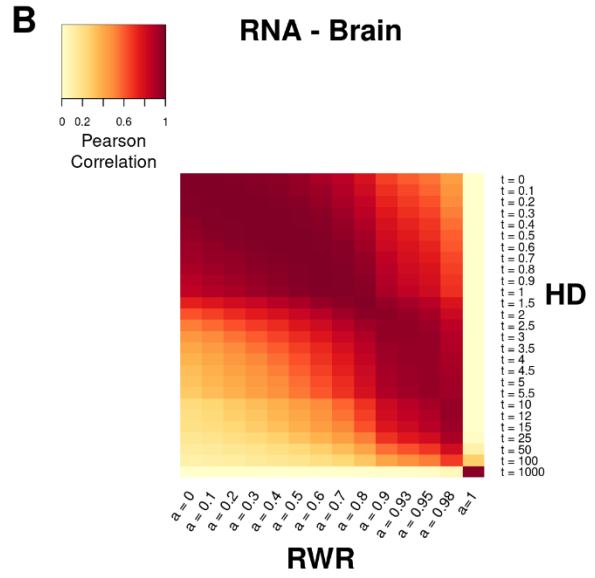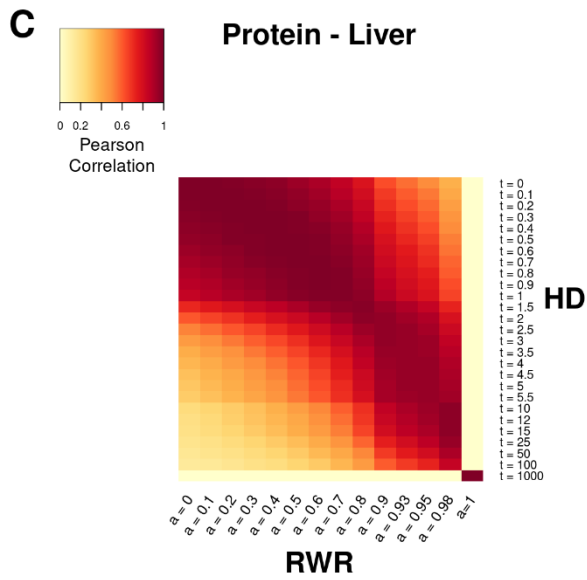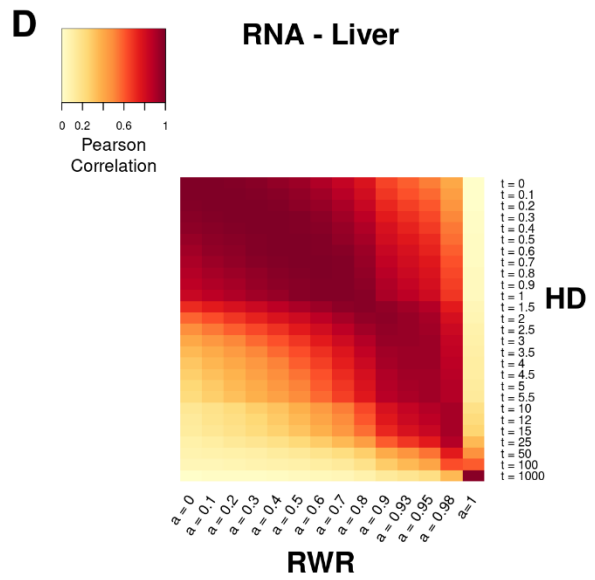

Supplement: pcbi.1009161.s001.pdf [file pcbi.1009161.s001.pdf]
